# Supplementary material for: A physically cross-linked self-healable double-network polymer hydrogel as a framework for nanomaterial
Source: Royal Society of Chemistry journal article supplement (doi:10.1039/c7nj03392c), 2017-01-01
Supplement: c7nj03392c1.pdf [file c7nj03392c1.pdf]

Supplemental files

**Physically Cross-linked Self-Healable Double Network Polymer Hydrogel as  
Framework for Nanomaterial**

Yuan Zhuang<sup>a</sup>, Yan Kong<sup>a</sup>, Kun Han<sup>a</sup>, Haotian Hao<sup>a</sup>, Baoyou Shi<sup>a,b\*</sup>

<sup>a</sup> Key Laboratory of Drinking Water Science and Technology, Research Center for  
Eco-Environmental Sciences, Chinese Academy of Sciences, Beijing, 100085, China.

Tel: 86-10- 62922155, Email: byshi@rcees.ac.cn.

<sup>b</sup> University of Chinese Academy of Sciences, Beijing 100049, China

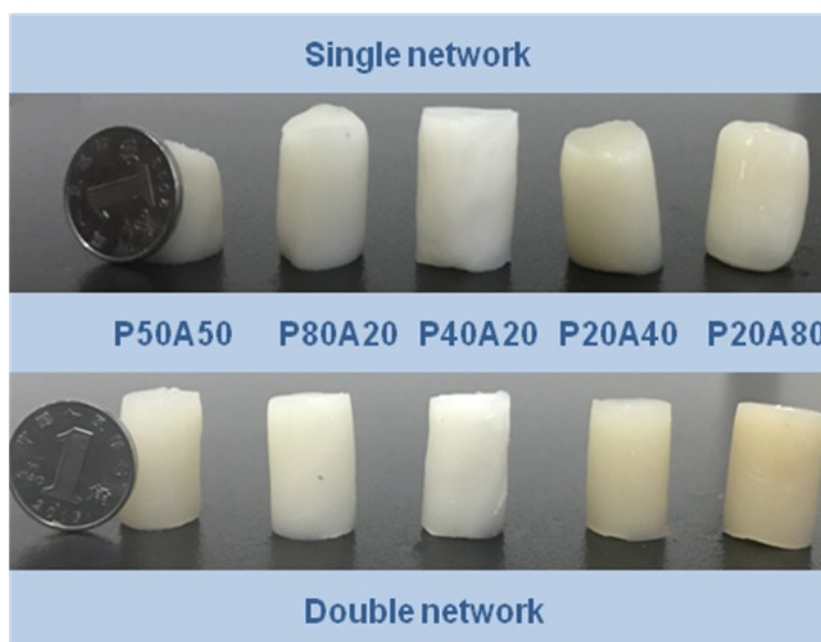

Figure S1 Optical photographs of single network and double network hydrogels under  
different preparation concentrations.

\* Corresponding author. Tel: 86-10- 62922155, Email: byshi@rcees.ac.cn.

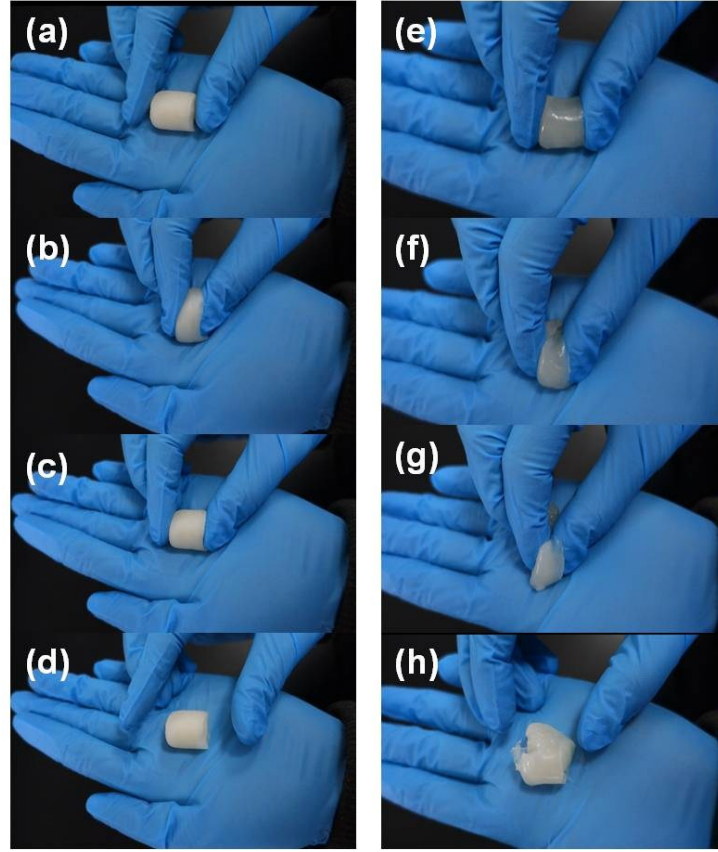

Figure S2 Optical photographs of P20A40S (a), (b), (c) and (d), and P20A40D (e), (f), (g) and (h), pressed with hand.

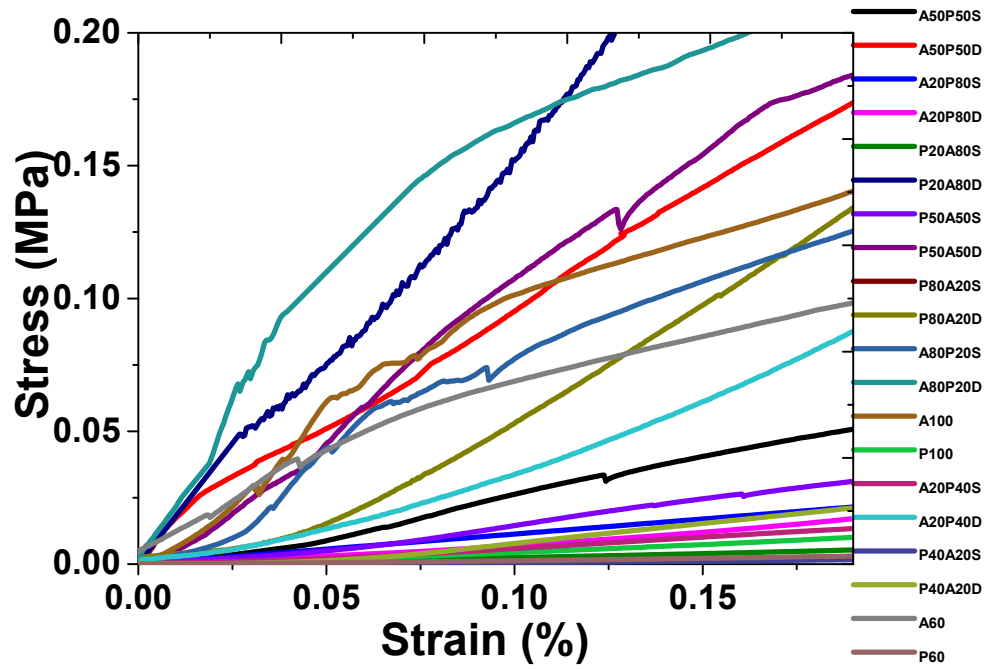

Figure S3 Compressive stress and strain curves of the hydrogels.
